# Supplementary material
Source: HighWire-hosted journal article supplement (https://jnm.snmjournals.org/highwire/filestream/103962/field_highwire_adjunct_files/0/260760_Supplemental_Data.pdf)
Supplement: 260760_Supplemental_Data.pdf [file 260760_Supplemental_Data.pdf]

## **MATERIALS AND METHODS**

### **Patients**

Patients were deemed unsuitable for  $^{177}\text{Lu}$ -DOTATATE if disease demonstrated low avidity SSR imaging (uptake equal to or less than liver activity), hypoalbuminemia (albumin level  $\leq 25$  g/L), thrombocytopenia (platelet count  $< 50 \times 10^9/\text{L}$  at PMCC and  $< 70 \times 10^9/\text{L}$  at HHUMC), pancytopenia (hemoglobin level  $< 10$  g/dL and white cell count  $< 3 \times 10^9/\text{L}$  for the Israeli center), Eastern Cooperative Oncology Group (ECOG) performance score of 4, expected survival  $< 3$  months, or confirmed pregnancy.

### **Ethical Approval**

All patients at PMCC were treated on compassionate grounds under the Special Access Scheme (SAS), which allows treatment of patients with life-threatening diseases with experimental therapies that have demonstrated efficacy in other studies. The use of SAS provisions was approved by the institutional ethics committee (Peter Mac Project No: 19/214R) and all patients provided written informed consent to undergo treatment and follow-up. The Israeli Ministry of Health approves PRRT treatment for patients with metastatic progressive NETs and the study was approved by the HHUMC institutional ethical committee (approval number: 0072–16).

### **Therapy**

At PMCC radio-labelling and administration of  $^{177}\text{Lu}$ -DOTATATE was performed under local institutional protocol as previously published (1). Radiolabelling of  $^{177}\text{Lu}$ -DOTATATE at HHUMC was also published previously (2).

At PMCC, an earlier protocol used infusional fluorouracil (5-FU) as a radiosensitizer (typically 200 mg/m<sup>2</sup> daily, starting 2 days before  $^{177}\text{Lu}$ -DOTATATE for 2 weeks in total). With the availability of oral capecitabine, a 5FU prodrug, this substituted 5FU at the dosage of 825 mg/m<sup>2</sup> twice daily commencing 2 days before  $^{177}\text{Lu}$ -DOTATATE for 2 weeks. At the discretion of the oncologist following discussion at the multidisciplinary team meeting, if temozolomide was combined with capecitabine, this was administered at 100mg/m<sup>2</sup> twice daily for 5 days commencing on the day of  $^{177}\text{Lu}$ -DOTATATE for 5 days.

### **Follow-up**

Chromogranin A (CgA) assessment at baseline and follow-up was not included in the manuscript due to the different reference ranges of the two institutions' laboratories and to avoid any possible flaws related to the inter and intra-laboratory variations and also several interfering factors with CgA levels.

$^{18}\text{F}$ -FDG PET/CT response was based on PMCC criteria and grouped : complete response ( $^{18}\text{F}$ -FDG-avid lesions revert to the background of normal tissues in which they are located), partial response (significant reduction in tumor uptake), stable disease (no visible change in metabolic activity of tumors), progressive disease (increase in intensity or extent of tumor metabolic activity or new sites) (3,4).

Supplemental Table 1. Imaging response of all patients

| Patient | <sup>68</sup> Ga-DOTATATE PET/CT response | <sup>18</sup> F-FDG PET/CT response | RECIST 1.1 response |
|---------|-------------------------------------------|-------------------------------------|---------------------|
| 1       | Partial response                          | na                                  | Partial response    |
| 2       | Partial response                          | na                                  | Partial response    |
| 3       | Partial response                          | Partial response                    | Partial response    |
| 4       | Partial response                          | na                                  | Partial response    |
| 5       | Partial response                          | na                                  | Partial response    |
| 6       | Stable disease                            | na                                  | Partial response    |
| 7       | Partial response                          | Partial response                    | Partial response    |
| 8       | Partial response                          | na                                  | Partial response    |
| 9       | Partial response                          | Partial response                    | Stable disease      |
| 10      | Partial response                          | na                                  | Stable disease      |
| 11      | Partial response                          | na                                  | Stable disease      |
| 12      | Partial response                          | na                                  | Stable disease      |
| 13      | Partial response                          | na                                  | Stable disease      |
| 14      | Partial response                          | Partial response                    | Stable disease      |
| 15      | Stable disease                            | na                                  | Stable disease      |
| 16      | Partial response                          | na                                  | Stable disease      |
| 17      | Stable disease                            | na                                  | Stable disease      |
| 18      | Stable disease                            | na                                  | Stable disease      |
| 19      | Partial response                          | na                                  | Stable disease      |
| 20      | Stable disease                            | na                                  | Stable disease      |
| 21      | Partial response                          | Stable disease                      | Stable disease      |
| 22      | Stable disease                            | na                                  | Stable disease      |
| 23      | Stable disease                            | Stable disease                      | Stable disease      |
| 24      | Stable disease                            | Partial response                    | Stable disease      |
| 25      | Stable disease                            | Stable disease                      | Stable disease      |
| 26      | Stable disease                            | na                                  | Stable disease      |
| 27      | Stable disease                            | na                                  | Stable disease      |
| 28      | Stable disease                            | na                                  | Stable disease      |
| 29      | Stable disease                            | na                                  | Stable disease      |
| 30      | Stable disease                            | na                                  | Stable disease      |
| 31      | Partial response                          | na                                  | Stable disease      |
| 32      | na                                        | na                                  | Stable disease      |
| 33      | Stable disease                            | na                                  | Stable disease      |
| 34      | Progressive disease                       | na                                  | Stable disease      |
| 35      | Stable disease                            | na                                  | Stable disease      |
| 36      | Progressive disease                       | na                                  | Progressive disease |
| 37      | Progressive disease                       | Progressive disease                 | Progressive disease |
| 38      | Progressive disease                       | Progressive disease                 | Progressive disease |

|    |                     |                     |                     |
|----|---------------------|---------------------|---------------------|
| 39 | Stable disease      | Progressive disease | Progressive disease |
| 40 | Progressive disease | Progressive disease | Progressive disease |
| 41 | na                  | na                  | na                  |
| 42 | na                  | na                  | na                  |
| 43 | na                  | na                  | na                  |
| 44 | na                  | na                  | na                  |
| 45 | na                  | na                  | na                  |
| 46 | na                  | na                  | na                  |
| 47 | na                  | na                  | na                  |
| 48 | na                  | na                  | na                  |

na: not available

Supplemental Table 2. Summary of the studies of PRRT in lung neuroendocrine neoplasia (carcinoid)

| Reference            | Study         | n (TC: AC)              | Therapy                                          | Response Criteria                                | CR n (%) | PR n (%)  | SD n (%)   | Progressive disease n (%) | Follow-up (mo)* | PFS mo (95% CI)* | OS mo (95%CI)* |
|----------------------|---------------|-------------------------|--------------------------------------------------|--------------------------------------------------|----------|-----------|------------|---------------------------|-----------------|------------------|----------------|
| <b>Current study</b> | Retrospective | 48 (5:43)               | <sup>177</sup> Lu                                | RECIST                                           | 0        | 8/40 (20) | 27/40 (68) | 5/40 (12)                 | 42              | 23 (18-28)       | 59 (50-NR)     |
| <b>(5)</b>           | Prospective   | 34 (15:19)              | <sup>177</sup> Lu                                | SWOG                                             | 1 (3)    | 4 (12)    | 16 (47)    | 13 (38)                   | 29              | 18 (13-26)       | 49(26-69)      |
| <b>(6)</b>           | Retrospective | 22 (5:17)               | <sup>177</sup> Lu                                | RECIST                                           | 0        | 6 (27)    | 9 (41)     | 7(32)                     | 54              | 27 (9-45)        | 42 (25-59)     |
| <b>(7)</b>           | Retrospective | 22 (13:8)<br>1 SCLC     | <sup>177</sup> Lu                                | RECIST                                           | 1/19 (5) | 1/19 (5)  | 11/19 (58) | 6/19 (32)                 | NS              | NS               | 40             |
| <b>(8)</b>           | Retrospective | 48 (15:32)<br>1 unknown | <sup>177</sup> Lu                                | Review of notes/radiology reports/correspondence | 0        | 16 (33)   | 24† (50)   | 8 (17)                    | 33              | NS               | 43             |
| <b>(9)</b>           | Retrospective | 114 (34:40)<br>40 NOS   | <sup>177</sup> Lu or <sup>90</sup> Y or combined | RECIST                                           | 0        | 15 (13)   | 61 (54)    | 38 (33)                   | 45              | 28               | 59             |
| <b>(10)</b>          | Retrospective | 23‡                     | <sup>177</sup> Lu                                | RECIST                                           | 0        | 7 (30)    | 7 (30)     | 6 (26)                    | 64              | 20               | 52 (49-55)     |
| <b>(11)</b>          | Retrospective | 9 (4:5)                 | <sup>177</sup> Lu                                | SWOG                                             | 0        | 5 (56)    | 3† (33)    | 1 (11)                    | 20              | 31               | NS             |
| <b>(12)</b>          | Prospective   | 13                      | <sup>177</sup> Lu or <sup>90</sup> Y or combined | Functional response on PET/CT                    | 0        | 8 (62)    | 3 (23)     | 2 (15)                    | NS              | NS               | NS             |
| <b>(13)</b>          | Prospective   | 5                       | <sup>177</sup> Lu                                | RECIST                                           | 0        | 2 (40)    | 3† (60)    | 0                         | 29              | NS               | NS             |
| <b>(14)</b>          | Retrospective | 6                       | <sup>177</sup> Lu or <sup>90</sup> Y or combined | RECIST                                           | 0        | 1 (17)    | 3 (50)     | 2 (33)                    | 17              | NS               | NS             |
| <b>(15)</b>          | Prospective   | 6                       | <sup>177</sup> Lu                                | RECIST                                           | 0        | 1 (17)    | 5 (83)     | 0                         | 31              | NS               | NS             |

\*Figures have been rounded off

† minor response is grouped as stable disease

‡ Including 3 not evaluable patients

AC: atypical carcinoid; CI: confidence interval; CR: complete response; <sup>177</sup>Lu: <sup>177</sup>Lu-DOTATATE; n: number of patients; NR: Not reached; NS: not stated; NOS: Not otherwise specified; OS: overall survival; Progressive disease: progressive disease; PR: partial response; RECIST: response evaluation criteria for solid tumors; SCLC: small cell lung carcinoma; TC: typical carcinoid; SWOG: Southwest Oncology Group; <sup>90</sup>Y: <sup>90</sup>Y-DOTATATE

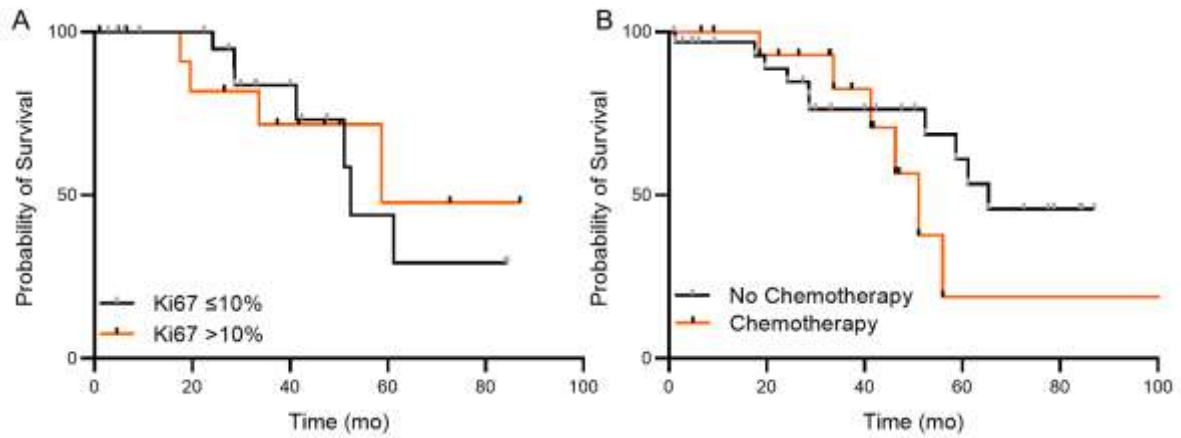

Supplemental Figure 1. Kaplan Meier plot of atypical carcinoid showing no significant difference in OS of the patients with Ki67 $\leq$ 10% compared to those with Ki67 $>$ 10% (A). No significant difference in OS of the patients treatment with concurrent chemosensitizing chemotherapy and those without chemotherapy (B).

## REFERENCES

1. Kong G, Johnston V, Ramdave S, Lau E, Rischin D, Hicks RJ. High-administered activity In-111 octreotide therapy with concomitant radiosensitizing 5FU chemotherapy for treatment of neuroendocrine tumors: preliminary experience. *Cancer Biother Radiopharm.* 2009;24:527-533.
2. Kong G, Grozinsky-Glasberg S, Hofman MS, et al. Efficacy of Peptide Receptor Radionuclide Therapy for Functional Metastatic Paraganglioma and Pheochromocytoma. *J Clin Endocrinol Metab.* 2017;102:3278-3287.
3. Wahl RL, Jacene H, Kasamon Y, Lodge MA. From RECIST to PERCIST: evolving considerations for PET response criteria in solid tumors. *J Nucl Med.* 2009;50 Suppl 1:122S-150S.
4. Hicks RJ. The role of PET in monitoring therapy. *Cancer Imaging.* 2005;5:51-57.
5. Ianniello A, Sansovini M, Severi S, et al. Peptide receptor radionuclide therapy with (177)Lu-DOTATATE in advanced bronchial carcinoids: prognostic role of thyroid transcription factor 1 and (18)F-FDG PET. *Eur J Nucl Med Mol Imaging.* 2016;43:1040-1046.
6. Sabet A, Haug AR, Eiden C, et al. Efficacy of peptide receptor radionuclide therapy with (177)Lu-octreotate in metastatic pulmonary neuroendocrine tumors: a dual-centre analysis. *Am J Nucl Med Mol Imaging.* 2017;7:74-83.
7. Parghane RV, Talole S, Prabhaskar K, Basu S. Clinical response profile of metastatic/advanced pulmonary neuroendocrine tumors to peptide receptor radionuclide therapy with 177Lu-DOTATATE. *Clin Nucl Med.* 2017;42:428-435.
8. Lim LE, Chan DL, Thomas D, et al. Australian experience of peptide receptor radionuclide therapy in lung neuroendocrine tumours. *Oncotarget.* 2020;11:2636-2646.
9. Mariniello A, Bodei L, Tinelli C, et al. Long-term results of PRRT in advanced bronchopulmonary carcinoid. *Eur J Nucl Med Mol Imaging.* 2016;43:441-452.

10. Brabander T, van der Zwan WA, Teunissen JJM, et al. Long-term efficacy, survival, and safety of [(177)Lu-DOTA(0),Tyr(3)]octreotate in patients with gastroenteropancreatic and bronchial neuroendocrine tumors. *Clin Cancer Res.* 2017;23:4617-4624.
11. van Essen M, Krenning EP, Bakker WH, de Herder WW, van Aken MO, Kwekkeboom DJ. Peptide receptor radionuclide therapy with 177Lu-octreotate in patients with foregut carcinoid tumours of bronchial, gastric and thymic origin. *Eur J Nucl Med Mol Imaging.* 2007;34:1219-1227.
12. Filice A, Fraternali A, Frasoldati A, et al. Radiolabeled somatostatin analogues therapy in advanced neuroendocrine tumors: a single centre experience. *J Oncol.* 2012;2012:320198.
13. Bodei L, Cremonesi M, Grana CM, et al. Peptide receptor radionuclide therapy with (1)(7)(7)Lu-DOTATATE: the IEO phase I-II study. *Eur J Nucl Med Mol Imaging.* 2011;38:2125-2135.
14. Pfeifer AK, Gregersen T, Gronbaek H, et al. Peptide receptor radionuclide therapy with Y-DOTATOC and (177)Lu-DOTATOC in advanced neuroendocrine tumors: results from a Danish cohort treated in Switzerland. *Neuroendocrinology.* 2011;93:189-196.
15. Garske-Roman U, Sandstrom M, Fross Baron K, et al. Prospective observational study of (177)Lu-DOTA-octreotate therapy in 200 patients with advanced metastasized neuroendocrine tumours (NETs): feasibility and impact of a dosimetry-guided study protocol on outcome and toxicity. *Eur J Nucl Med Mol Imaging.* 2018;45:970-988.
